# Supplementary material for: A limited anodic and cathodic potential window of MoS2: limitations in electrochemical applications
Source: Royal Society of Chemistry journal article supplement (doi:10.1039/c4nr06899h), 2015-01-01
Supplement: c4nr06899h1.pdf [file c4nr06899h1.pdf]

Supplementary Information

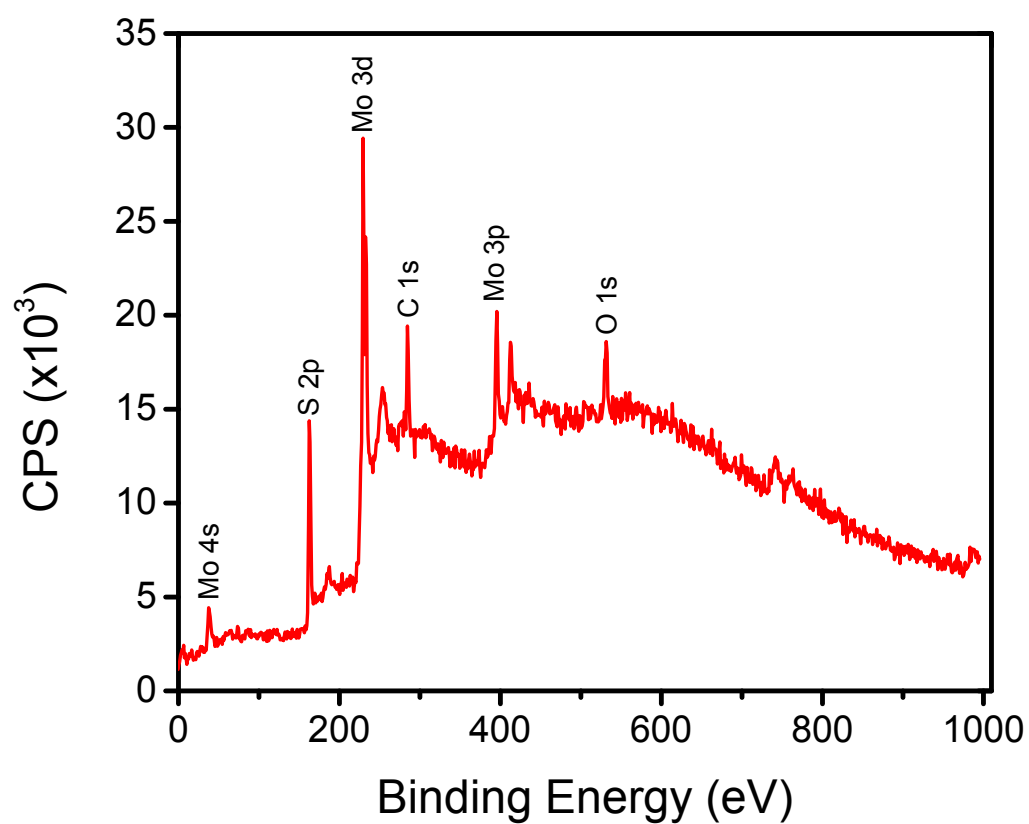

Figure S1. Survey X-ray photoelectron spectrum of MoS<sub>2</sub> after exfoliation. Mo and S signals originate from MoS<sub>2</sub> while C and O from the sample holder. Note the absence of Li 1s signal at ~55 eV.
